# Supplementary material for: Chimeric GPCRs mimic distinct signaling pathways and modulate microglia responses
Source: PubMed Central journal article supplement (PMC9378622; doi:10.1038/s41467-022-32390-1), 2022-08-15
Supplement: 41467_2022_32390_MOESM3_ESM.pdf [file 41467_2022_32390_MOESM3_ESM.pdf]

## Description of Additional Supplementary Files

**Supplementary Data 1:** Putative GPCR signaling domains of all receptors included in the multiple protein sequence alignment.

**Supplementary Data 2:** Results of differential gene expression analysis of the mRNA sequencing experiment.

**Supplementary Data 3:** Details on R environment, statistical models, and test parameters for all graphs.
